# Supplementary material
Source: Springer Nature journal article supplement (https://www.springermedizin.de/resource/supplementary/12885_2011_2910_MOESM2_ESM.pdf/9462258)

Relative mRNA expression

0.200  
0.150  
0.100  
0.050  
0.000

T

N

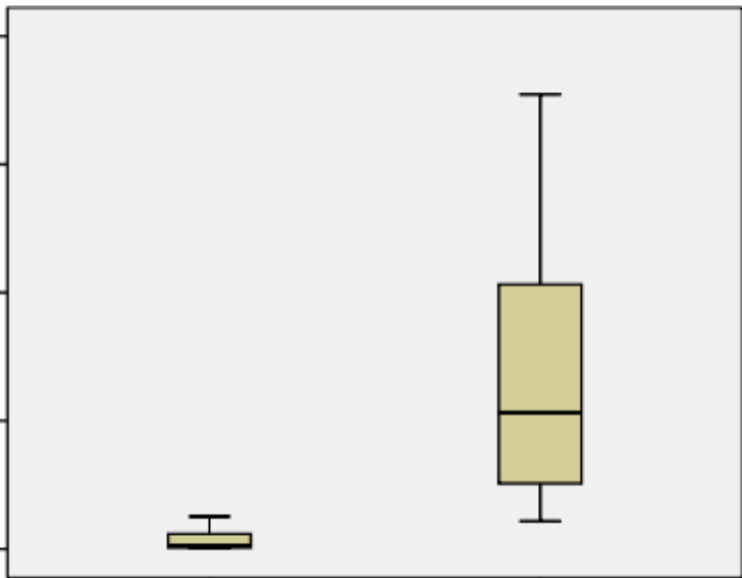

Supplement: MOESM2 [file 9462258]
